# Supplementary material
Source: PubMed Central journal article supplement (PMC4682651)
Supplement: EMBJ-34-2758-s001.pdf [file EMBJ-34-2758-s001.pdf]

# Appendix

## ***Alu* element-containing RNAs maintain nucleolar structure and function**

Maiwen Caudron-Herger, Teresa Pankert, Jeanette Seiler, Attila Németh, Renate Voit, Ingrid

Grummt and Karsten Rippe

### **Table of contents**

Appendix Tables S1 to S5

Appendix Figures S1 to S9

## Appendix Tables

**Appendix Table S1. Distribution of transcripts in total, nucleoplasmic and nucleolar RNA.**

|                                         | genomic region                                   | total RNA   | nucleoplasmic RNA | nucleolar RNA |
|-----------------------------------------|--------------------------------------------------|-------------|-------------------|---------------|
| transcripts distribution (% , $\pm$ SD) | primary transcripts<br>(exon + intron)           | 70 $\pm$ 14 | 89 $\pm$ 1        | 42 $\pm$ 1    |
|                                         | spliced transcripts<br>(exon only)               | 26 $\pm$ 15 | 8 $\pm$ 3         | 32 $\pm$ 2    |
|                                         | intron only                                      | 4 $\pm$ 1   | 4 $\pm$ 4         | 26 $\pm$ 3    |
|                                         | intron only<br>overlapping<br><i>Alu</i> repeats | 1 $\pm$ 2   | 2 $\pm$ 1         | 10 $\pm$ 2    |

**Appendix Table S2. List of read clusters overlapping intronic *Alu* elements found in the nucleolar RNA and the corresponding clusters found in nucleoplasmic and total RNA.**

NE indicates the normalized expression value for each cluster. Clusters are listed from the most enriched in the nucleolar RNA (top) to the most enriched in the nucleoplasmic and/or total RNA (bottom). The *Alu* repeat elements overlapping with those clusters are also listed.

**Appendix Table S2.** List of read clusters overlapping intronic *Alu* elements found in the nucleolar RNA and the corresponding clusters found in nucleoplasmic and total RNA.

| <i>Alu</i> repeats |           |           |        |        | nucleolar RNA clusters |           |           |             |        | nucleoplasmic RNA clusters |           |           |            |        | total RNA clusters |           |           |             |        |
|--------------------|-----------|-----------|--------|--------|------------------------|-----------|-----------|-------------|--------|----------------------------|-----------|-----------|------------|--------|--------------------|-----------|-----------|-------------|--------|
| chr                | start     | end       | strand | name   | chr                    | start     | end       | NE          | strand | chr                        | start     | end       | NE         | strand | chr                | start     | end       | NE          | strand |
| chr8               | 124446700 | 124446848 | +      | AluSz  | chr8                   | 124446700 | 124446848 | 30371.1486  | +      | chr8                       | 124446236 | 124446872 | 12.0699659 | +      | chr8               | 124446662 | 124446913 | 165.534542  | +      |
| chr3               | 53342369  | 53342502  | -      | AluIr4 | chr3                   | 53342369  | 53342502  | 6076.66833  | -      | chr3                       | 53342361  | 53342923  | 6.97024694 | -      | chr3               | 53342364  | 53342564  | 52.0018171  | -      |
| chr6               | 125312049 | 125312178 | +      | AluIr  | chr6                   | 125312049 | 125312178 | 1843.40026  | +      | chr6                       | 125311832 | 125312372 | 3.71821059 | +      | chr6               | 125311997 | 125312166 | 43.1710428  | +      |
| chr14              | 31577361  | 31577475  | -      | AluSq2 | chr14                  | 31577361  | 31577475  | 2339.76996  | -      | chr14                      | 31577192  | 31577659  | 4.9328637  | -      | chr14              | 31576655  | 31578806  | 5.01481325  | -      |
| chr17              | 30525565  | 30525679  | +      | AluJb  | chr17                  | 30525565  | 30525679  | 2658.8295   | +      | chr17                      | 30525456  | 30525739  | 7.57336616 | +      | chr17              | 30525565  | 30525673  | 687.797236  | +      |
| chr17              | 74041054  | 74041121  | -      | AluSp  | chr17                  | 74041054  | 74041185  | 1371.99295  | -      | chr17                      | 74040407  | 74041466  | 4.42029299 | -      | chr17              | 74041061  | 74041179  | 613.047077  | -      |
| chr17              | 45739648  | 45739667  | +      | AluSx  | chr17                  | 45739648  | 45739760  | 2767.31373  | +      | chr17                      | 45739454  | 45740543  | 9.52716477 | +      | chr17              | 45738595  | 45743615  | 3.05513171  | +      |
| chr17              | 45739668  | 45739760  | +      | AluJb  | chr17                  | 45739648  | 45739760  | 2767.31373  | +      | chr17                      | 45739454  | 45740543  | 9.52716477 | +      | chr17              | 45738595  | 45743615  | 3.05513171  | +      |
| chr1               | 10220812  | 10220975  | +      | AluJo  | chr1                   | 10220812  | 10220975  | 826.195769  | +      | chr1                       | 10220661  | 10221056  | 3.21559057 | +      | chr1               | 10220759  | 10220961  | 14.6043365  | +      |
| chrX               | 19363525  | 19363662  | +      | AluSq2 | chrX                   | 19363525  | 19363662  | 3003.776229 | +      | chrX                       | 19363313  | 19363668  | 12.5501909 | +      | chrX               | 19363522  | 19363635  | 1405.526663 | +      |
| chr9               | 95054566  | 95054620  | -      | AluJb  | chr9                   | 95054566  | 95054871  | 4302.0278   | -      | chr9                       | 95053493  | 95055546  | 18.3783117 | -      | chr9               | 95045146  | 95056014  | 10.5233473  | -      |
| chr1               | 206519071 | 206519141 | +      | AluIr  | chr1                   | 206519071 | 206519221 | 8074.64389  | +      | chr1                       | 206519073 | 206519363 | 40.3330431 | +      | chr1               | 206518883 | 206519453 | 13.3539394  | +      |
| chr1               | 206519143 | 206519211 | +      | AluJo  | chr1                   | 206519071 | 206519221 | 8074.64389  | +      | chr1                       | 206519073 | 206519363 | 40.3330431 | +      | chr1               | 206518883 | 206519453 | 13.3539394  | +      |
| chr1               | 206519214 | 206519221 | +      | AluJo  | chr1                   | 206519071 | 206519221 | 8074.64389  | +      | chr1                       | 206519073 | 206519363 | 40.3330431 | +      | chr1               | 206518883 | 206519453 | 13.3539394  | +      |
| chr1               | 235291256 | 235291283 | +      | AluSx  | chr1                   | 235291122 | 235291283 | 4560.86313  | -      | chr1                       | 235291026 | 235292198 | 23.8956889 | -      | chr1               | 235288776 | 235292283 | 15.7908724  | -      |
| chr5               | 133989397 | 133989526 | +      | AluJo  | chr5                   | 133989397 | 133989526 | 721.330535  | +      | chr5                       | 133989278 | 133989827 | 4.20292883 | +      | chr5               | 133989374 | 133989575 | 29.815225   | +      |
| chr11              | 73560978  | 73561107  | +      | AluJb  | chr11                  | 73560978  | 73561107  | 1683.10458  | +      | chr11                      | 73560850  | 73561186  | 12.186187  | +      | chr11              | 73560555  | 73561296  | 3.05066449  | +      |
| chr9               | 135255524 | 135255664 | -      | AluSx1 | chr9                   | 135255524 | 135255664 | 331.901586  | -      | chr9                       | 135255397 | 135256091 | 3.59459818 | -      | chr9               | 135255304 | 135255667 | 6.51252014  | -      |
| chr18              | 12469997  | 12470134  | -      | AluIr  | chr18                  | 12469997  | 12470134  | 811.83143   | -      | chr18                      | 12469988  | 12470250  | 9.67562653 | -      | chr18              | 12469992  | 12470347  | 3.72650053  | -      |
| chr6               | 99993898  | 99994040  | -      | AluSx  | chr6                   | 99993898  | 99994040  | 435.766709  | -      | chr6                       | 99993871  | 99994155  | 5.49434601 | +      | chr6               | 99989571  | 99995350  | 19.4639994  | -      |
| chr6               | 151253115 | 151253256 | +      | AluSx1 | chr6                   | 151253115 | 151253256 | 249.912596  | +      | chr6                       | 151252721 | 151253914 | 3.49564391 | +      | chr6               | 151253114 | 151253281 | 37.1646216  | +      |
| chr19              | 10672854  | 10673025  | -      | AluSx1 | chr19                  | 10672854  | 10673124  | 163.046098  | -      | chr19                      | 10672529  | 10673697  | 3.21590142 | -      | chr19              | 10672789  | 10673144  | 6.47234302  | -      |
| chr19              | 10673025  | 10673124  | -      | AluIr  | chr19                  | 10672854  | 10673124  | 163.046098  | -      | chr19                      | 10672529  | 10673697  | 3.21590142 | -      | chr19              | 10672789  | 10673144  | 6.47234302  | -      |
| chr6               | 31746278  | 31746374  | -      | AluJb  | chr6                   | 31746136  | 31746374  | 293.887068  | -      | chr6                       | 31744878  | 31753727  | 6.24842475 | -      | chr6               | 31745288  | 31749385  | 3.98516212  | -      |
| chr3               | 57887592  | 57887736  | +      | AluSz  | chr3                   | 57887592  | 57887736  | 381.535465  | +      | chr3                       | 57887422  | 57887825  | 8.8359191  | +      | chr3               | 57887558  | 57887897  | 3.73372567  | +      |
| chr20              | 37057711  | 37057917  | -      | AluJb  | chr20                  | 37055925  | 37058529  | 2251.72386  | -      | chr20                      | 37054752  | 37063360  | 55.5099121 | -      | chr20              | 37052040  | 37064010  | 59.2007137  | -      |
| chrX               | 21862407  | 21862612  | +      | AluJb  | chrX                   | 21862407  | 21862612  | 535.917687  | +      | chrX                       | 21862359  | 21862651  | 13.3258319 | +      | chrX               | 21862406  | 21862631  | 24.6321558  | +      |
| chr6               | 99993898  | 99994040  | -      | AluSx  | chr6                   | 99993898  | 99994040  | 435.766709  | -      | chr6                       | 99993836  | 99994111  | 13.796319  | -      | chr6               | 99989571  | 99995350  | 19.4639994  | -      |
| chr5               | 130498578 | 130498802 | -      | AluSx  | chr5                   | 130498578 | 130498802 | 489.408408  | -      | chr5                       | 130498493 | 130498883 | 18.066035  | -      | chr5               | 130494307 | 130500361 | 32.9309319  | -      |
| chr3               | 186504715 | 186504845 | -      | AluJb  | chr3                   | 186503918 | 186505686 | 2937.86714  | +      | chr3                       | 186503889 | 186506010 | 109.607775 | +      | chr3               | 186501259 | 186509060 | 183.0339305 | -      |
| chr18              | 43705063  | 43705234  | +      | AluSx  | chr18                  | 43705063  | 43705281  | 103.454281  | +      | chr18                      | 43704958  | 43705360  | 3.9245948  | +      | chr18              | 43705007  | 43705271  | 7.68845848  | +      |
| chr18              | 43705234  | 43705281  | +      | AluSg  | chr18                  | 43705063  | 43705281  | 103.454281  | +      | chr18                      | 43704958  | 43705360  | 3.9245948  | +      | chr18              | 43705007  | 43705271  | 7.68845848  | +      |
| chr2               | 10931045  | 10931175  | -      | AluIr  | chr2                   | 10931045  | 10931175  | 722.309314  | -      | chr2                       | 10930844  | 10931212  | 28.8376923 | -      | chr2               | 10930251  | 10931254  | 10.5651881  | -      |
| chr10              | 126762919 | 126763029 | -      | AluSq2 | chr10                  | 126762859 | 126763029 | 176.481011  | -      | chr10                      | 126762832 | 126763509 | 8.8909877  | -      | chr10              | 126762842 | 126763030 | 31.39869    | -      |
| chr2               | 135894382 | 135894574 | +      | AluIr  | chr2                   | 135894207 | 135894574 | 69.1722163  | +      | chr2                       | 135894168 | 135894652 | 4.62562652 | +      | chr2               | 135894207 | 135894574 | 25.5775053  | +      |
| chr14              | 20791540  | 20791561  | +      | AluJb  | chr14                  | 20791347  | 20791561  | 1161.66928  | -      | chr14                      | 20790806  | 20792059  | 85.2744003 | -      | chr14              | 20790854  | 20791883  | 41.4722224  | -      |
| chr6               | 151345556 | 151345682 | +      | AluIr  | chr6                   | 151345556 | 151345765 | 108.617892  | +      | chr6                       | 151345342 | 151346084 | 9.3630278  | +      | chr6               | 151345559 | 151345764 | 73.3127568  | +      |
| chr6               | 151345682 | 151345765 | +      | AluS26 | chr6                   | 151345556 | 151345765 | 108.617892  | +      | chr6                       | 151345342 | 151346084 | 9.3630278  | +      | chr6               | 151345559 | 151345764 | 73.3127568  | +      |
| chr2               | 17928824  | 17929014  | -      | AluSz  | chr2                   | 17928824  | 17929014  | 85.9551467  | -      | chr2                       | 17928767  | 17929326  | 8.50444944 | -      | chr2               | 17928874  | 17931084  | 3.06480583  | -      |
| chr19              | 13037137  | 13037386  | -      | AluY   | chr19                  | 13037137  | 13037464  | 58.6741203  | -      | chr19                      | 13037344  | 13037698  | 7.96572214 | -      | chr19              | 13037277  | 13037517  | 24.444158   | -      |
| chr19              | 13037390  | 13037464  | -      | AluJo  | chr19                  | 13037137  | 13037464  | 58.6741203  | -      | chr19                      | 13037344  | 13037698  | 7.96572214 | -      | chr19              | 13037277  | 13037517  | 24.444158   | -      |
| chr15              | 44112904  | 44113105  | -      | AluJb  | chr15                  | 44112904  | 44113186  | 18.8116221  | -      | chr15                      | 44112860  | 44113289  | 3.80156412 | -      | chr15              | 44112909  | 44113209  | 6.10557455  | -      |
| chr15              | 44113105  | 44113186  | -      | AluJo  | chr15                  | 44112904  | 44113186  | 18.8116221  | -      | chr15                      | 44112860  | 44113289  | 3.80156412 | -      | chr15              | 44112909  | 44113209  | 6.10557455  | -      |
| chr15              | 60675435  | 60675627  | -      | AluJb  | chr15                  | 60675435  | 60675834  | 19.3349974  | -      | chr15                      | 60675073  | 60676639  | 4.83371957 | -      | chr15              | 60674404  | 60689870  | 5.23008853  | -      |
| chr5               | 1805384   | 1805466   | +      | AluJb  | chr5                   | 1805384   | 1805768   | 20.9982067  | +      | chr5                       | 1804850   | 1808882   | 8.22967057 | +      | chr5               | 1801479   | 1812864   | 4.15774001  | +      |
| chr6               | 111022137 | 111022414 | +      | AluSg4 | chr6                   | 111022137 | 111022430 | 23.0532944  | +      | chr6                       | 111022135 | 111022765 | 9.32338475 | +      | chr6               | 111022135 | 111022944 | 15.9378002  | +      |
| chr14              | 59668192  | 59668333  | +      | AluSx1 | chr14                  | 59668192  | 59668491  | 12.8399817  | +      | chr14                      | 59668110  | 59668453  | 5.34036816 | +      | chr14              | 59668088  | 59668476  | 3.04296451  | +      |
| chr14              | 59668360  | 59668491  | +      | AluSx8 | chr14                  | 59668192  | 59668491  | 12.8399817  | +      | chr14                      | 59668110  | 59668453  | 5.34036816 | +      | chr14              | 59668088  | 59668476  | 3.04296451  | +      |
| chr1               | 24842361  | 24842657  | +      | AluSg  | chr1                   | 24842361  | 24842659  | 31.9138192  | +      | chr1                       | 24842344  | 24842725  | 18.3173541 | +      | chr1               | 24842222  | 24842789  | 15.3788911  | +      |
| chr9               | 130211111 | 130211393 | -      | AluSz  | chr9                   | 130210699 | 130211408 | 58.2244486  | -      | chr9                       | 130210058 | 130213921 | 42.7176502 | -      | chr9               | 130206453 | 130214342 | 29.5451618  | -      |
| chr1               | 62491210  | 62491452  | +      | AluS26 | chr1                   | 62490955  | 62491452  | 10.8066937  | +      | chr1                       | 62490897  | 62491500  | 8.75769038 | +      | chr1               | 62490937  | 62491426  | 8.16360381  | +      |
| chr17              | 75085816  | 75085828  | +      | AluSq  | chr17                  | 75085383  | 75085828  | 275.82981   | +      | chr17                      | 75085235  | 75086545  | 238.353636 | +      | chr17              | 75084748  | 75091820  | 32.6334626  | +      |
| chr17              | 2233260   | 2233514   | -      | AluSp  | chr17                  | 2233260   | 2233620   | 6.07962429  | -      | chr17                      | 2232824   | 2233611   | 3.42518679 | -      | chr17              | 2231984   | 2235871   | 11.3267954  | -      |
| chr19              | 18200164  | 18200391  | +      | AluS26 | chr19                  | 18200164  | 18200391  | 27.0901525  | +      | chr19                      | 18200159  | 18200435  | 40.3742189 | +      | chr19              | 18200160  | 18200611  | 16.9034467  | +      |
| chr1               | 173836374 | 173836666 | +      | AluSx  | chr1                   | 173835670 | 173837115 | 29.7564661  | -      | chr1                       | 173832907 | 173837111 | 18.2996409 | -      | chr1               | 173828783 | 173837252 | 44.0832754  | -      |
| chr17              | 47647071  | 47647365  | -      | AluSx  | chr17                  | 47647048  | 47647365  | 15.0956045  | -      | chr17                      | 47647026  | 47647372  | 10.7435887 | -      | chr17              | 47647033  | 47647365  | 18.70860601 | -      |
| chr9               | 126147440 |           |        |        |                        |           |           |             |        |                            |           |           |            |        |                    |           |           |             |        |

|       |           |           |   |        |       |           |           |            |   |       |           |           |            |   |       |           |           |            |   |
|-------|-----------|-----------|---|--------|-------|-----------|-----------|------------|---|-------|-----------|-----------|------------|---|-------|-----------|-----------|------------|---|
| chr11 | 62433771  | 62433795  | + | AluJo  | chr11 | 62433771  | 62434338  | 4.3407252  | + | chr11 | 62431811  | 62434742  | 3.4580893  | - | chr11 | 62432796  | 62435895  | 16.3918911 | + |
| chr16 | 27357009  | 27357103  | + | AluSx1 | chr16 | 27356652  | 27357103  | 4.16655936 | + | chr16 | 27356445  | 27357313  | 3.60344133 | + | chr16 | 27356432  | 27357521  | 4.74897886 | + |
| chr5  | 138613642 | 138613869 | + | AluJo  | chr5  | 138613642 | 138613869 | 24.6274113 | + | chr5  | 138611090 | 138613909 | 22.8894546 | + | chr5  | 138609805 | 138622580 | 58.2316993 | + |
| chr19 | 46191251  | 46191340  | - | AluSx6 | chr19 | 46191070  | 46191340  | 16.1698609 | - | chr19 | 46190298  | 46192748  | 15.9125318 | - | chr19 | 46190298  | 46193108  | 39.342161  | + |
| chr19 | 1414038   | 1414312   | - | AluSx  | chr19 | 1414038   | 1414704   | 3.1963712  | - | chr19 | 1413890   | 1414743   | 16.7173066 | + | chr19 | 1407417   | 1418063   | 3.06597703 | + |
| chr19 | 1414463   | 1414704   | + | AluSc  | chr19 | 1414038   | 1414704   | 3.1963712  | + | chr19 | 1413890   | 1414743   | 16.7173066 | + | chr19 | 1407417   | 1418063   | 3.06597703 | + |
| chr1  | 145398761 | 145399016 | + | AluSq  | chr1  | 145398761 | 145399031 | 16.1698609 | + | chr1  | 145398751 | 145399010 | 19.4343966 | + | chr1  | 145398716 | 145399103 | 24.3197452 | + |
| chr9  | 139621615 | 139621632 | + | AluSx1 | chr9  | 139620993 | 139621632 | 27.8214329 | - | chr9  | 139618877 | 139621590 | 36.4747919 | - | chr9  | 139618038 | 139622624 | 41.8738295 | - |
| chr1  | 28906528  | 28906810  | + | AluSx1 | chr1  | 28906185  | 28906810  | 13.6127298 | - | chr1  | 28905071  | 28908377  | 20.4350412 | - | chr1  | 28902210  | 28908384  | 18.7501953 | - |
| chr1  | 173833125 | 173833236 | + | AluJo  | chr1  | 173833078 | 173834668 | 11.6660032 | - | chr1  | 173832907 | 173837111 | 18.2996409 | - | chr1  | 173828783 | 173837252 | 44.0832754 | - |
| chr1  | 173834074 | 173834348 | + | AluSz  | chr1  | 173833078 | 173834668 | 11.6660032 | - | chr1  | 173832907 | 173837111 | 18.2996409 | - | chr1  | 173828783 | 173837252 | 44.0832754 | - |
| chr8  | 144536421 | 144536560 | - | AluSq  | chr8  | 144536421 | 144536871 | 9.50908345 | - | chr8  | 144536252 | 144537469 | 15.5315944 | - | chr8  | 144536154 | 144536872 | 49.4586014 | - |
| chr8  | 144536572 | 144536871 | - | AluY   | chr8  | 144536421 | 144536871 | 9.50908345 | - | chr8  | 144536252 | 144537469 | 15.5315944 | - | chr8  | 144536154 | 144536872 | 49.4586014 | - |
| chr18 | 3453402   | 3453709   | + | AluSp  | chr18 | 3453353   | 3453794   | 6.71926218 | + | chr18 | 3448755   | 3454438   | 11.9474627 | + | chr18 | 3450129   | 3459945   | 7.58020499 | + |
| chr5  | 72378741  | 72378999  | - | AluSc5 | chr5  | 72378741  | 72378999  | 20.3296008 | - | chr5  | 72378731  | 72379004  | 51.3895256 | - | chr5  | 72378567  | 72379012  | 32.4916665 | + |
| chr1  | 76252925  | 76253040  | - | AluJb  | chr1  | 76252644  | 76253577  | 4.90971658 | + | chr1  | 76252702  | 76254348  | 12.7303621 | + | chr1  | 76251902  | 76263275  | 25.1130162 | + |
| chr1  | 28832737  | 28832996  | - | AluSx  | chr1  | 28832737  | 28833166  | 19.5993481 | + | chr1  | 28832510  | 28833501  | 55.0376747 | + | chr1  | 28832507  | 28840775  | 873.875538 | + |
| chr19 | 51305758  | 51306042  | + | AluSg  | chr19 | 51305565  | 51306372  | 5.94777354 | - | chr19 | 51304362  | 51306342  | 20.898747  | - | chr19 | 51305073  | 51308245  | 13.8224813 | + |
| chr17 | 16344915  | 16345132  | - | AluJb  | chr17 | 16344915  | 16345217  | 13.4368718 | + | chr17 | 16344248  | 16349056  | 51.831124  | + | chr17 | 16342193  | 16350716  | 35.825746  | + |
| chr20 | 47895879  | 47895971  | + | AluSx  | chr20 | 47895204  | 47895971  | 3.92351611 | + | chr20 | 47895185  | 47902641  | 18.5537597 | + | chr20 | 47895155  | 47907586  | 24.577384  | + |
| chr11 | 62433771  | 62433795  | + | AluJo  | chr11 | 62433771  | 62434338  | 4.3407252  | + | chr11 | 62432800  | 62434810  | 21.0898146 | + | chr11 | 62432796  | 62435895  | 16.3918911 | + |
| chr19 | 3546836   | 3546892   | - | AluY   | chr19 | 3546569   | 3546892   | 12.7599962 | - | chr19 | 3530712   | 3554077   | 90.3273933 | - | chr19 | 3541215   | 3549575   | 13.7273115 | - |
| chr12 | 49523584  | 49523778  | - | AluJr  | chr12 | 49523574  | 49524482  | 4.43380256 | - | chr12 | 49522869  | 49525165  | 34.364989  | - | chr12 | 49522475  | 49525201  | 62.9184338 | - |
| chr7  | 1574535   | 1574596   | - | AluJo  | chr7  | 1574113   | 1574596   | 5.01310333 | + | chr7  | 1570366   | 1589639   | 42.2611055 | + | chr7  | 1570930   | 1582868   | 9.67684138 | + |
| chr7  | 1574788   | 1574847   | - | AluJo  | chr7  | 1574788   | 1576242   | 4.82600551 | + | chr7  | 1570366   | 1589639   | 42.2611055 | + | chr7  | 1570930   | 1582868   | 9.67684138 | + |
| chr7  | 1575008   | 1575309   | + | AluJb  | chr7  | 1574788   | 1576242   | 4.82600551 | + | chr7  | 1570366   | 1589639   | 42.2611055 | + | chr7  | 1570930   | 1582868   | 9.67684138 | + |
| chr1  | 1413277   | 1413383   | - | AluSp  | chr1  | 1413277   | 1413393   | 12.8539669 | + | chr1  | 1413119   | 1414036   | 124.352448 | + | chr1  | 1412069   | 1414036   | 29.0583085 | + |
| chr1  | 1413385   | 1413676   | - | AluSx1 | chr1  | 1413277   | 1413393   | 12.8539669 | + | chr1  | 1413119   | 1414036   | 124.352448 | + | chr1  | 1412069   | 1414036   | 29.0583085 | + |
| chr19 | 58903563  | 58903707  | + | AluSz  | chr19 | 58903563  | 58904179  | 6.28431835 | + | chr19 | 58902343  | 58905039  | 70.924147  | + | chr19 | 58898134  | 58906458  | 25.6466567 | + |
| chr19 | 58903710  | 58903998  | + | AluSx3 | chr19 | 58903563  | 58904179  | 6.28431835 | + | chr19 | 58902343  | 58905039  | 70.924147  | + | chr19 | 58898134  | 58906458  | 25.6466567 | + |
| chr6  | 90431340  | 90431412  | - | AluJo  | chr6  | 90431143  | 90431412  | 17.7272116 | + | chr6  | 90430889  | 90431433  | 214.487333 | + | chr6  | 90430974  | 90431430  | 130.846099 | + |
| chr19 | 3542491   | 3542779   | - | AluSx1 | chr19 | 3542491   | 3544730   | 7.21548318 | - | chr19 | 3530712   | 3554077   | 90.3273933 | + | chr19 | 3541215   | 3549575   | 13.7273115 | - |
| chr19 | 18498921  | 18498941  | - | AluSx1 | chr19 | 18498921  | 18499695  | 7.91090439 | + | chr19 | 18496769  | 18500210  | 103.181609 | + | chr19 | 18496365  | 18500426  | 19.2428169 | + |
| chr7  | 44839700  | 44839790  | - | AluSx  | chr7  | 44839172  | 44839790  | 3.12671648 | + | chr7  | 44839024  | 44840494  | 42.8720631 | + | chr7  | 44836234  | 44843083  | 59.6829872 | + |
| chr16 | 87869206  | 87869379  | - | AluY   | chr16 | 87869206  | 87870208  | 3.67705048 | - | chr16 | 87863675  | 87870971  | 68.8242894 | - | chr16 | 87869344  | 87870370  | 3.93278655 | - |
| chr9  | 128001877 | 128002024 | + | AluSx  | chr9  | 128000877 | 128002024 | 12.5266584 | - | chr9  | 128000048 | 128003619 | 355.048018 | - | chr9  | 127997077 | 128003770 | 75.8741305 | - |
| chr9  | 128000306 | 128000389 | + | AluSx  | chr9  | 128000306 | 128000761 | 7.07877742 | - | chr9  | 128000048 | 128003619 | 355.048018 | - | chr9  | 127997077 | 128003770 | 75.8741305 | - |
| chr11 | 61733577  | 61733745  | + | AluSc8 | chr11 | 61733577  | 61735144  | 7.97628495 | - | chr11 | 61731564  | 61736302  | 516.86961  | - | chr11 | 61729329  | 61735380  | 358.414701 | - |

**Appendix Table S3. Nucleolar-enriched *al*uRNA-containing clusters**

| chr   | start    | end      | NE nucleolar RNA | NE total RNA | strand | length | region*   |
|-------|----------|----------|------------------|--------------|--------|--------|-----------|
| chr1  | 10220812 | 10220975 | 826.20           | 14.60        | +      | 163    | Region_1  |
| chr1  | 24842361 | 24842659 | 31.91            | 15.38        | +      | 298    | Region_2  |
| chr1  | 62490955 | 62491452 | 10.81            | 8.16         | +      | 497    | Region_3  |
| chr1  | 1.44E+08 | 1.44E+08 | 7334.69          | 47.93        | +      | 149    |           |
| chr1  | 1.56E+08 | 1.56E+08 | 2284.79          | 69.33        | -      | 122    |           |
| chr1  | 2.07E+08 | 2.07E+08 | 8074.64          | 13.35        | +      | 150    |           |
| chr2  | 10931045 | 10931175 | 722.31           | 10.57        | -      | 130    | Region_4  |
| chr2  | 17928824 | 17929014 | 85.96            | 3.06         | -      | 190    | Region_5  |
| chr3  | 53342369 | 53342502 | 6076.67          | 52.00        | -      | 133    | Region_6  |
| chr3  | 57887592 | 57887736 | 381.54           | 3.73         | +      | 144    | Region_7  |
| chr5  | 1805384  | 1805768  | 21.00            | 4.16         | +      | 384    |           |
| chr5  | 1.3E+08  | 1.3E+08  | 489.41           | 32.93        | -      | 224    | Region_8  |
| chr5  | 1.34E+08 | 1.34E+08 | 721.33           | 29.82        | +      | 129    | Region_9  |
| chr6  | 31746136 | 31746374 | 293.89           | 3.99         | -      | 238    |           |
| chr6  | 99993898 | 99994040 | 435.77           | 19.46        | -      | 142    | Region_10 |
| chr6  | 1.25E+08 | 1.25E+08 | 1843.40          | 43.17        | +      | 129    | Region_11 |
| chr6  | 1.51E+08 | 1.51E+08 | 249.91           | 37.16        | +      | 141    | Region_12 |
| chr6  | 1.51E+08 | 1.51E+08 | 108.62           | 73.31        | +      | 209    |           |
| chr7  | 1068849  | 1069071  | 120.57           | 4.68         | -      | 222    | Region_13 |
| chr8  | 1.24E+08 | 1.24E+08 | 30371.15         | 165.53       | +      | 148    | Region_14 |
| chr9  | 95054566 | 95054871 | 4302.03          | 10.52        | -      | 305    |           |
| chr9  | 1.3E+08  | 1.3E+08  | 58.22            | 29.55        | -      | 709    | Region_15 |
| chr9  | 1.35E+08 | 1.35E+08 | 331.90           | 6.51         | -      | 140    | Region_16 |
| chr10 | 1.04E+08 | 1.04E+08 | 661.39           | 35.40        | -      | 122    | Region_17 |
| chr10 | 1.27E+08 | 1.27E+08 | 176.48           | 31.40        | -      | 170    |           |
| chr11 | 73560978 | 73561107 | 1683.10          | 3.05         | +      | 129    | Region_18 |
| chr11 | 93466262 | 93466929 | 374.35           | 40.96        | -      | 667    |           |
| chr11 | 93467946 | 93468425 | 542.37           | 40.96        | -      | 479    | Region_19 |
| chr14 | 31577361 | 31577475 | 2339.77          | 5.01         | -      | 114    | Region_20 |
| chr14 | 59668192 | 59668491 | 12.84            | 3.04         | +      | 299    |           |
| chr15 | 44112904 | 44113186 | 18.81            | 6.11         | -      | 282    | Region_21 |
| chr15 | 60675435 | 60675834 | 19.33            | 5.23         | -      | 399    | Region_22 |
| chr17 | 30525565 | 30525679 | 2658.83          | 687.80       | +      | 114    | Region_23 |
| chr17 | 45739648 | 45739760 | 2767.31          | 3.06         | +      | 112    |           |
| chr17 | 74041054 | 74041185 | 1371.99          | 613.05       | -      | 131    |           |
| chr17 | 75085383 | 75085828 | 275.83           | 32.63        | +      | 445    |           |
| chr18 | 12469997 | 12470134 | 811.83           | 3.73         | -      | 137    | Region_24 |
| chr18 | 43705063 | 43705281 | 103.45           | 7.69         | +      | 218    |           |
| chr19 | 1414038  | 1414704  | 3.20             | 3.07         | +      | 666    | Region_25 |
| chr19 | 1636211  | 1636342  | 722.10           | 4.76         | -      | 131    | Region_26 |
| chr19 | 1956418  | 1956567  | 513.26           | 30.19        | +      | 149    |           |
| chr19 | 5140383  | 5140493  | 1658.66          | 3.07         | +      | 110    |           |
| chr19 | 10672854 | 10673124 | 163.05           | 6.47         | -      | 270    | Region_27 |
| chr19 | 13037137 | 13037464 | 58.67            | 24.44        | -      | 327    | Region_28 |
| chr20 | 37055925 | 37058529 | 2251.72          | 59.20        | -      | 2604   | Region_29 |
| chrX  | 19363525 | 19363662 | 3003.78          | 1405.53      | +      | 137    | Region_30 |
| chrX  | 21862407 | 21862612 | 535.92           | 24.63        | +      | 205    | Region_31 |

\* Regions that were used for the alignment in Figure S2. NE indicates the normalized expression value for each cluster.

**Appendix Table S4. Sequences of DNA and RNA probes used in this study**

| Sample                                    | Sequence                                                                                                                                                                                                                                                                                                                           |
|-------------------------------------------|------------------------------------------------------------------------------------------------------------------------------------------------------------------------------------------------------------------------------------------------------------------------------------------------------------------------------------|
| <i>alu</i> RNA ASO 1                      | AGCGATTCTCCTGCCTCAGC                                                                                                                                                                                                                                                                                                               |
| <i>alu</i> RNA ASO 2                      | GGCTCACTGCAACCGCCACC                                                                                                                                                                                                                                                                                                               |
| <i>alu</i> RNA ASO 3                      | AGTAGCTGGGATTACAGGCA                                                                                                                                                                                                                                                                                                               |
| control ASO                               | CCGTCAGCCAGTACTGCCTC                                                                                                                                                                                                                                                                                                               |
| L1-repeat ASO                             | GGTTAGTTACATATGTATAC                                                                                                                                                                                                                                                                                                               |
| 7SL-RNA ASO                               | GGCATAGCGCACTACAGCCC                                                                                                                                                                                                                                                                                                               |
| <i>alu</i> RNA LNA                        | AGCAATTCTCCTGCCTCAGC                                                                                                                                                                                                                                                                                                               |
| B1 ASO - 1                                | TTTGTAGACCAGGCTGGCCT                                                                                                                                                                                                                                                                                                               |
| B1 ASO - 2                                | ATCCGCCTGCCTCTGCCTCC                                                                                                                                                                                                                                                                                                               |
| L1-repeat LNA                             | GCAGGTTAGTTACATATGTA                                                                                                                                                                                                                                                                                                               |
| Northern blot<br><i>alu</i> RNA probe NB1 | GGCTCACTGCAACCGCCACC                                                                                                                                                                                                                                                                                                               |
| <i>alu</i> RNA FISH 1                     | GGGTTCAAGCGATTCTCCTGCCTCAGCCTCCCGAGTAG<br>CTGGGACTACAG                                                                                                                                                                                                                                                                             |
| <i>alu</i> RNA FISH 2                     | CGCCCGCCTCGGCCTCCCAAAGTGCTGGGATGACAGG<br>CGTGAGCCACTGA                                                                                                                                                                                                                                                                             |
| <i>alu</i> RNA FISH 1c                    | CTGTAGTCCCAGCTACTCGGGAGGCTGAGGCAGGAGA<br>ATCGCTTGAACCC                                                                                                                                                                                                                                                                             |
| <i>alu</i> RNA FISH 2c                    | TCAGTGGCTCACGCCTGTCATCCCAGCACTTTGGGAGG<br>CCGAGGCGGGCG                                                                                                                                                                                                                                                                             |
| L1-repeat FISH                            | CATGGCACATGTATACATATGTAACCTGCACAATG<br>TGCACATGTAC                                                                                                                                                                                                                                                                                 |
| Met tRNA FISH                             | GGTTTAGATCCATCGACCTCTGGGTTATGGGCCAGCA<br>CGCTTCCGCTGC                                                                                                                                                                                                                                                                              |
| Ala tRNA FISH                             | GGATCGAACCGAGGCCTCATAATGCAAAGCATGCGC<br>TCTACCACTGAGC                                                                                                                                                                                                                                                                              |
| RNA FISH, MS2<br>loops                    | GTCGACCTGCAGACATGGGTGATCCTCATGTTTTCTAG<br>GCAATTA                                                                                                                                                                                                                                                                                  |
| Primer actin FWD                          | TATCCTGACCCTGAAGTACC                                                                                                                                                                                                                                                                                                               |
| Primer actin REV                          | CTCGGTGAGCAGCACAGGG                                                                                                                                                                                                                                                                                                                |
| Primer B1-1 FWD                           | AGGCCAGCCTGGTCTACAAA                                                                                                                                                                                                                                                                                                               |
| Primer B1 REV                             | CGAGACAGGGTTTCTCTG                                                                                                                                                                                                                                                                                                                 |
| Primer B1-2 FWD                           | GGAGGCAGAGGCAGGCGGAT                                                                                                                                                                                                                                                                                                               |
| forward <i>alu</i> RNA<br>with MS2 loops  | CTGGACTGACTTCATAGTTTAAACGTCAAGAGAAGGCC<br>GGGCTCAGTGGCTCACGCCTGTCATCCCAGCACTTTG<br>GGAGGCCGAGGCGGGCGGGTCACGAGGTCAAGAGAT<br>CGAGACCATCCGGGCCGACACGGTGAACCCCGTCTC<br>TATTAAGTATAAAGATTAGCTGGGCGTGGTGGCGGG<br>CACCTGTAGTCCCAGCTACTCGGGAGGCTGAGGCAGG<br>AGAATCGCTTGAACCCAGGGAGGTGGCGGTTGCAGTG<br>AGCCGAGATCACACCATCGCACTCCAGCCTGGGCGAC |

|                                                     |                                                                                                                                                                                                                                                                                                                                                                                                                                                                                                                                                                                                                                                                                                                                                                                                                                                                                       |
|-----------------------------------------------------|---------------------------------------------------------------------------------------------------------------------------------------------------------------------------------------------------------------------------------------------------------------------------------------------------------------------------------------------------------------------------------------------------------------------------------------------------------------------------------------------------------------------------------------------------------------------------------------------------------------------------------------------------------------------------------------------------------------------------------------------------------------------------------------------------------------------------------------------------------------------------------------|
|                                                     | AGAGCGAGAC                                                                                                                                                                                                                                                                                                                                                                                                                                                                                                                                                                                                                                                                                                                                                                                                                                                                            |
| forward <i>aluRNA<sub>L</sub></i><br>with MS2 loops | CTGGACTGACTTCATAGTTTAAACGTCAAGAGAAGGCC<br>GGGCTCAGTGGCTCACGCCTGTCATCCCAGCACTTTG<br>GGAGGCCGAGGCCGGCGGGTCACGAGGTCAAGAGAT<br>CGAGACCATCCGGGCCGACACGGTGAAACCCCGTCTC<br>T                                                                                                                                                                                                                                                                                                                                                                                                                                                                                                                                                                                                                                                                                                                 |
| forward <i>aluRNA<sub>R</sub></i><br>with MS2 loops | ATTAAAAGTATAAAGATTAGCTGGGCGTGGTGGCGGGC<br>ACCTGTAGTCCCAGCTACTCGGGAGGCTGAGGCAGGA<br>GAATCGCTTGAACCCAGGGAGGTGGCGGTTGCAGTGA<br>GCCGAGATCACACCATCGCACTCCAGCCTGGGCGACA<br>GAGCGAGAC                                                                                                                                                                                                                                                                                                                                                                                                                                                                                                                                                                                                                                                                                                        |
| CDV3 RNA with<br>MS2 loops                          | GATGAGGTTTTCAAAAACCAGGCCCTTAACTTCAGCT<br>AGACAACCAATATGCTGTGCTTGAAAATCAGAAAAGCA<br>GCCACTCACAATACAATTAAGGAATGGGCTTTGCTAAC<br>CCTTCTGAGGTAAGTACTGACTGCAGCTAACCACCACAA<br>CAGCCATTCATCATCTGATCTCTGCTGGATCTACAGACA<br>CCGATGCAGACCACTCGATTTTCATGACCGGCCCTATTG<br>CACTATGGAAGTTAAAGTGTACGACTGCTCTATGCAT<br>ATTGGATTTAGGGGAATTTTCATTGTTACATAAATGTGT<br>GAACTAGTTTCAACAGTGTCTTTTCATATTTACTCTGCA<br>AATACAAAAAACCAAAACCTGCAGCCAGTGGTCATTTT<br>AAAATCTTTTTATGTTTCAGATACTGAGCCTTCATAAGGG<br>TTGACTACCTCAGATTTGCTGCACTCATTGTGGACTTCA<br>TGTGGATCACAACCTTCTGGATAAGAAGATTACAACCTATT<br>AAGTGTGATGTGAACCTTGCAACCAGCTCTACTGGAT<br>TCTTATCAGAAATCCTGCATAAAAAGTCAGCCATCTGG<br>GTTCTGATCTGCTGTAAAAGATGAAGATTTAAGTGACCT<br>TAATTAACCTGTCCTGTGCCCTACCCTTAAGGAATACTC<br>TCTGTAGTAGGCTGTTGTTATATTAGACTTCCTGGAACA<br>CACTGCTGAAAAGAAGTGTGTTTCAGATCATCTGTGT<br>AGGGCTGTGATTTGTAATTTAACTAATTGTATTCTGAG<br>GTA |
| RepA RNA with<br>MS2 loops                          | CACTCTTTTTCTATATTTTGCCCATCGGGGCTGCGGAT<br>ACCTGGTTTTATTATTTTTCTTTGCCCAACGGGGCCGT<br>GGATACCTGCCTTTTAATCTTTTTTATTGCCCCATCGG<br>GGCCGCGGATACCTGCTTTTTATTTTTTTTTCTTAGCC<br>CATCGGGGTATCGGATACCTGCTGATTCCCTTCCCCTC<br>TGAACCCCAACACTCTGGCCCATCGGGGTGACGGAT<br>ATCTGCTTTTTAAAAATTTCTTTTTTTGGCCCATCGGG<br>GCTTCGGATACCTGCTTTTTTTTTTTTTATTTTCCTTGCC<br>CATCGGGGCTCGGATACCTGCTTTAATTTTTGTTTTTC<br>TGCCCATCGGGGCCGCGGATACCTGCTTTGATTTTTTT<br>TTTTCATCGCCATCGGTGCTTTTTATGGATGAA                                                                                                                                                                                                                                                                                                                                                                                                                 |
| STARD7 RNA with<br>MS2 loops                        | TACCAATCTTTATGTATTTATTACACATTTGATAAAAAT<br>GTCACAGTTAGGAGTGAAATCATTACAATGACATGAGT<br>AACTGTACAGACAGACCCCAAGTGCAGAATCAAATTGC<br>CCTAAGTCAGAACATGGAGCAACCGCAACTCCTTCGCA<br>CTTGTGCATGTGTGTGCGCTCGCAGACGCACACACACA<br>CACACATATTCTCTCTCTCTTTATGCACACATCCATCC<br>ACATCCCAACAATTGCAGGTGCTAAGTTTGGACATAAC<br>CCAGGGACTCTTCCCTGACTTCTGTCAGGTCTTGAAA<br>GAAGAAGTAATAAATGAAAAGCAGCTGGGACTGCTCGA<br>TGCATCTCTCTCTTCCAACAATGACGCGGAGAAGGCA<br>AGACATACACTGGGGCAGCTACTTCTTGGCACAAAAA<br>TGAACAGGCAACAAGAAGGTCAAGGAAGTGTTAAGTT                                                                                                                                                                                                                                                                                                                                                                     |

|                                       |                                                                                                                                                                                                                                                                                                                                                                                                                                                                                                                                                                                                                                                                                                                                                                                                                                                                                                                                                                                                                                                                                                                                                                                                                                                                                                                                                                                                                                                                                                                                                                                                                                                                                     |
|---------------------------------------|-------------------------------------------------------------------------------------------------------------------------------------------------------------------------------------------------------------------------------------------------------------------------------------------------------------------------------------------------------------------------------------------------------------------------------------------------------------------------------------------------------------------------------------------------------------------------------------------------------------------------------------------------------------------------------------------------------------------------------------------------------------------------------------------------------------------------------------------------------------------------------------------------------------------------------------------------------------------------------------------------------------------------------------------------------------------------------------------------------------------------------------------------------------------------------------------------------------------------------------------------------------------------------------------------------------------------------------------------------------------------------------------------------------------------------------------------------------------------------------------------------------------------------------------------------------------------------------------------------------------------------------------------------------------------------------|
|                                       | <p>AGTCTCAGGTTTAAACCACTTTTCAACACCACAAAACAG<br/> TAGCAAGCAGGAAAACAAAAACAAAAACAAAAACAAA<br/> ACTCTGGCCCTCAAGACTCCAGAAAAAAGGGAAGGAG<br/> GAGGATTTAAAACCTTGATCCCTATTATTCTAACAAATTG<br/> CAGCATGACCATAAGCAAACCAGCTCGGTCAAACCTGA<br/> CAGCATCAGATTGTGACCTTATCTGAACAGTGTAGTTCA<br/> CTTTTATTTTGGCTCTGAAGAGAGGAAGAAAACTTTTT<br/> AGAGGAACTTAATGGTAACATAAACCAAATCTCCACTGT<br/> ATTAGTATTTGAGACAAGATTACATCTATGCATTACAC<br/> AGCTTGTCTGTAGATCTGAGAGCTCCAAGGGAGTGGCC<br/> CAGCCCCCATTCTCTGACTTTAGCCTTCTGAAAAGAA<br/> CAAGTCAAACCTGAAATATGAAAAATAATACCTGAATCA<br/> AAATGGTGTCTTCTATACAATCGGACTAGGGTAGAATCC<br/> TGCTCAATTCCTCAACTCCTATTTGACACAAAAGTAAA<br/> AAATTTTTAACTAAATTTAAATGTGATGTTTTGAGCATC<br/> AAAAAGCTACTATCTAAAAGGATTAGTCTCCCAGTGTTT<br/> TTGGTAAATGGGGAAGGTTAGGAAGGAGGCAATGATC<br/> CAATGAATATAGAAGAACTGGCCGATTCACAGGAAACT<br/> TGCTTTGGATAAGGTGAGTCAATGGGTGATATTGTGCA<br/> GGCAGGGAGGGAAATTTCTTTGTACAAATTCATGTCCC<br/> TGGCCAGGCATGGCCAGGAGTTCAAGACCAGCCTGG<br/> GAAACAGAGTGAAACTCCATCTCTACTTAAAAAAAAAAAA<br/> AAATTAATAATAACTTCATGTCTCTAGAGATAAAAGCAA<br/> GGTGCGGACAAGGCACTTAACATAGCCAAGTATCGTTC<br/> ACACCCATTCACATCATGATTGTTACCAAGAGCACTCC<br/> CAGTAGCCCCCTCATTGAGAGACTCAACTGGCCAACATA<br/> TACTTTCCAGGTGGACCTGGAGAACTGAAGGAAATCCA<br/> AAGCGCTGCACAATCGATGGTGGGATTTGGAATGTCAG<br/> CAGAGGAACTACTCAGAGAAGCAAATGGAGGTCATCC<br/> CCTTCTGGCCTGAGGTGAGAGGTTTGTCCAGATTAGC<br/> TCAGTGAGATACCGAATTTCAAACAGTTGGCCTGAGA<br/> ATATGACAACACTCCCACAAATGTAGCCTTCTTCTGTTT<br/> TGATAAGAGCAATAAGGGCTCTGAATGAAATGGGACAT<br/> CAGTTATTGAATTATCTTGCACTGGAAGTTACAGCAGAT<br/> GCCTTCTAATACATGTGGCATGTCCCCCTTCTACAGCA<br/> GAGTGATAACGGACTGAGACAGGGCTAGAAGCACCTT<br/> GTCCCTTCTTATCCCAAAGCCTG</p> |
| <p>CORO1C RNA<br/> with MS2 loops</p> | <p>TAATCAATGATTTTTATCTCTGAAAATGGAAGCAAGTGT<br/> TTTGACAGAACACTATGGCCACTCTATAAGAGCCGACC<br/> TAGGAGTAATTCAGTGTCTCTTCTGGGATGTCATGGC<br/> TTAAAAAAAAAAAAAAAAAAGACAAAACAGGAAAATAA<br/> TCCACAATGCTTTGGGCGCCTACTCTGAGCTTGGCTGG<br/> GCATCCATTCATTAATAAGTCATAAGCTACAACTAAG<br/> ATCAGGGTAACTTTCCCTTGGCCTCCTGCTTCTTTTGA<br/> ACCACATGCCCTACGGTGTTCACCACCATCAACAACCT<br/> TACTTCATTAATTCGATATCAGAACCCTTAAAACACTACT<br/> GAATCTTAGACAAAAGGTCCTCAGCAGATTACATTGATA<br/> AAGAAACAAATACAGATTTGAATATAAGTCATTGCCATT<br/> ATTGTTTTCTTTACATCTCATGATCCACTTCAATATTA<br/> CACATACATACACACACAAAACCACATCAAACATTCA<br/> GATGCCCTGAAATTGTGGAGACAGCACTCCCAGTATTG<br/> GCTGGATAAGAACATGGTCCTTTTTCTACACGGACATTA<br/> CTCCAAGTTCGGCTGTCACCACACTCTGCCCTCACCTT<br/> GGCTCCCTGCATACAGACGTTTCCAGCCAGTCCCATGC<br/> CCACACCAGCACGAGCATGTGCAAGAATTCCCTTCGTG</p>                                                                                                                                                                                                                                                                                                                                                                                                                                                                                                                                                                                                                                                                                                                                                                                                                                                        |



|                                                                         |                                                                                                                                                                                                                                                                                                                                                                                                                                                                                                                                                                                                                                                                                                                                                                                                                                                                                                                                                                                                                                                                                                                                                                                                                                                                                                                                                                                                                                                                                                                                                                                                                                                                                                                                                                                                                                                                                                  |
|-------------------------------------------------------------------------|--------------------------------------------------------------------------------------------------------------------------------------------------------------------------------------------------------------------------------------------------------------------------------------------------------------------------------------------------------------------------------------------------------------------------------------------------------------------------------------------------------------------------------------------------------------------------------------------------------------------------------------------------------------------------------------------------------------------------------------------------------------------------------------------------------------------------------------------------------------------------------------------------------------------------------------------------------------------------------------------------------------------------------------------------------------------------------------------------------------------------------------------------------------------------------------------------------------------------------------------------------------------------------------------------------------------------------------------------------------------------------------------------------------------------------------------------------------------------------------------------------------------------------------------------------------------------------------------------------------------------------------------------------------------------------------------------------------------------------------------------------------------------------------------------------------------------------------------------------------------------------------------------|
|                                                                         | <p>GTCCCAATGGCACTACACATTTACGTTCAATCACAGA<br/> CAGCCCTTCCAAAACAGAGGCTCCTTAAATCTTGTTTC<br/> CAAGCATGCACTATAAGAACTGGAAACGGGGCAAAGT<br/> TCCAGCTAACCGAGGAATGAACAGGTGACCAGAGCTC<br/> AGTCTCTGGCCCCCTCCGAGTCCGGGGAGCCTCTGTG<br/> CTTTGACGCAGCCTTGGTGAGAGATGGAGAGGCAGGG<br/> CAGGTTAGTTGTGCGGAGGGACATGTTTGTATGCATTA<br/> AAGCTACAGCAGAGGTCTGTGCTCCTGTTTCTGCTTCA<br/> CTCTCTATCATTCTCCTCAGTCTCAATACTCATTCAATC<br/> GCACCCTCTGGCCTTGTCTTAGCTTAATGTGGTTAGAG<br/> CTAAAAGGCAGGAAGGAAAGAAGGAATGGCTGGGGGA<br/> GCCCTGAGAGAGGTGCGCAGCACATGTGAGGAAGAGGG<br/> TAGAGCAGGAGCTTTGTTGGTGGGAAGGAGAGCCACTT<br/> CCTCCTCCAACACAGCATGGGGACAGCACAGGGAAAC<br/> AGGATCACCCAGGGCAAATACCCCTCTCCACATGCCCA<br/> CATTTTTAGTCCCCACCACTGTAAGAGCTGGGCA<br/> AGCTGCTGAAAAGGGCAAGAAGGAACACTCAGCAGTA<br/> CACGTCTTCTGTCTGGGCACCCTTGTCAAGTATTGA<br/> CCAAAACCTGAAACATGATGTTTAAAGTGATGAATGCAA<br/> TATGATCCTAGGTGTGTAACAACTGCAGAAACACATG<br/> CTAGTTTGGGTTAGATTATAATCATCTGAAGCACAGGAT<br/> AACCGAGAAGCAAATTCATTCTGGTACAAACACCCA<br/> ATTTCTAGAAAAGAGAAAAGGAAAAGAAGAAATACGACG<br/> TGAGCTTTTTTGTATCAGAAGACTCCATGAAATGAGAGC<br/> GGTGGTAATATGAATCCACGTGATTTTTCAAGTCTTCT<br/> GTTGTACAGTCATCAAATGACCAGGTTTGTGCTGCA<br/> AAGGAGCCAGCACCATGTGGCTACTGCTTTGATTGTTT<br/> TCAGATGAATGTTTATACAAAATAATATCTTATCTTCATT<br/> TAGTTTATAAACATACACAGTGCTGTCCCTTTCAAATTA<br/> AGGAAAAAAAAACCACACACACAAATACTGCAAAGTAGC<br/> AAAATACAAAGGAAAACAAAGCTACTTTTGGTTTTGGCA<br/> ACATTAAGAAAGAAAGAAATATAAAAAGCAATGTGGCAT<br/> TGGTCCCTATTCATTAAGAAAGGGTACTTGGGCA<br/> CGACACAATCAGAATTAGTTTGTCTTAAATTCAGAG<br/> TATCTGGGATTTTAAAAGTAGCACTTTTTAAAAGTTCA<br/> ACAAGTCACATAACACTTAAAACATCAAAAAGCTTTCT<br/> GATAAAAAGCTCAGCTTTTAAATCACGTTTTGTTTCTGC<br/> AAATTTGGGAGACAAATTGAGTTCTTACTGGAATGTGG<br/> CCTATCGCTGGTTGACAAATCTGAAATGGAATGTCTCC<br/> AAATGGCAGTGCCTCCCTTCCGCCCTCCCTAGGACCA<br/> CACCAATAACCAGCTCCAAGCACAGTTCTTGCTCCC<br/> ATTTTTCTGTAGGGGTGGGGGTGGGACCT</p> |
| forward <i>alu</i> RNA<br>template for T7 <i>in vitro</i> transcription | <p>TAATACGACTCACTATAGGGCTGGACTGACTTCATAGTT<br/> TAAACGTCAAGAGAAGGCCGGGCTCAGTGGCTCACGC<br/> CTGTATCCAGCACTTTGGGAGGCCGAGGCGGGCGG<br/> GTCACGAGGTCAAGAGATCGAGACCATCCGGGCGGAC<br/> ACGGTCAAACCCCGTCTCTATTAAGTATAAGATTAG<br/> CTGGGCGTGGTGGCGGGCACCTGTAGTCCAGCTACT<br/> CGGGAGGCTGAGGCAGGAGAATCGCTTGAACCCAGGG<br/> AGGTGGCGGTTGCAGTGAGCCGAGATCACACCATCGC<br/> ACTCCAGCCTGGGCGACAGAGCGAGAC</p>                                                                                                                                                                                                                                                                                                                                                                                                                                                                                                                                                                                                                                                                                                                                                                                                                                                                                                                                                                                                                                                                                                                                                                                                                                                                                                                                                                                                                                                                                                         |
| reverse <i>alu</i> RNA<br>template for T7 <i>in vitro</i> transcription | <p>TAATACGACTCACTATAGGGGTCTCGCTCTGTCGCCCA<br/> GGCTGGAGTGCGATGGTGTGATCTCGGCTCACTGCAA<br/> CCGCCACCTCCCTGGGTTCAAGCGATTCTCCTGCCTCA<br/> GCCTCCCGAGTAGCTGGGACTACAGGTGCCCGCCACC</p>                                                                                                                                                                                                                                                                                                                                                                                                                                                                                                                                                                                                                                                                                                                                                                                                                                                                                                                                                                                                                                                                                                                                                                                                                                                                                                                                                                                                                                                                                                                                                                                                                                                                                                                  |

|                                                                      |                                                                                                                                                                                                                                                                                                                                                                                                                                                                                                                      |
|----------------------------------------------------------------------|----------------------------------------------------------------------------------------------------------------------------------------------------------------------------------------------------------------------------------------------------------------------------------------------------------------------------------------------------------------------------------------------------------------------------------------------------------------------------------------------------------------------|
|                                                                      | ACGCCCAGCTAATCTTTATACTTTTAATAGAGACGGGGT<br>TTCACCGTGTCTGGCCCCGGATGGTCTCGATCTCTTGACC<br>TCGTGACCCGCCCGCCTCGGCCTCCCAAAGTGCTGGG<br>ATGACAGGCGTGAGCCACTGAGCCCGGCCTTCTCTTG<br>ACGTTTAAACTATGAAGTCAGTCCAG                                                                                                                                                                                                                                                                                                                  |
| RNA <sub>L</sub> template for<br>T7 <i>in vitro</i><br>transcription | TAATACGACTCACTATAGGGCTGGACTGACTTCATAGTT<br>TAAACGTCAAGAGAAGGCCGGGCTCAGTGGCTCACGC<br>CTGTCATCCCAGCACTTTGGGAGGCCGAGGCGGGCGG<br>GTCACGAGGTCAAGAGATCGAGACCATCCGGGGCCGAC<br>ACGGTGAAACCCCGTCTCT                                                                                                                                                                                                                                                                                                                           |
| RNA <sub>R</sub> template for<br>T7 <i>in vitro</i><br>transcription | TAATACGACTCACTATAGGGATTAAGTATAAAGATTA<br>GCTGGGCGTGGTGGCGGGCACCTGTAGTCCCAGCTAC<br>TCGGGAGGCTGAGGCAGGAGAATCGCTTGAACCCAGG<br>GAGGTGGCGGTTGCAGTGAGCCGAGATCACACCATCG<br>CACTCCAGCCTGGGCGACAGAGCGGAGAC                                                                                                                                                                                                                                                                                                                    |
| CDV3a template<br>for T7 <i>in vitro</i><br>transcription            | TAATACGACTCACTATAGGGAAATTCAAGGACGAATATT<br>TTCAAAAACCCTAGTGAAGAAGAAATATTTACTGATTAC<br>ATTTCTTTTCCCTTAG                                                                                                                                                                                                                                                                                                                                                                                                               |
| CDV3b template<br>for T7 <i>in vitro</i><br>transcription            | TAATACGACTCACTATAGGGGACCACCAGAAATCTACA<br>GTGATACACAGTTCCCATCCCTGCAGTCAACTGCCAAG<br>CATGTAGAAAGCCGGAA                                                                                                                                                                                                                                                                                                                                                                                                                |
| L1-repeat template<br>for T7 <i>in vitro</i><br>transcription        | TAATACGACTCACTATAGGGGACAGAGGCATTATTCAC<br>AATAGCAAAGACTTCGAACCAACCCAAATGTCCAACAA<br>TGATAGACTGGATTAAGAAAATGTGGCACATATACACC<br>ATGGAATACTATGCAGCCATAAAAAATGATGAGTTCATG<br>TCCTTTGTAGGGACATGGATGAAATTGGAAATCATCATT<br>CTCAGTAACTATCGCAAGAACAACAAAAACCAAACACCG<br>CATATTCTCATAGGTGGGAACTGAACAATGAGATCACA<br>TGGTCACAGGAAGGGGAATATCACACTCTGGGAACTGT<br>GGTGGGGTGGGGGGAGGGGGGAGGGGATAGCATTGGG<br>AGATATACCTAATGGTAGATGACGAGTTAGTGGGTGCA<br>GCACACCAGCATGGCACATGTATACATATGTAACCTAAC<br>CTGCACAATGTGCACATGTACGTAAAACCTTAAAG |

**Appendix Table S5. Summary of reads obtained from RNA-seq**

| sample                        | read length | # reads  | # uniquely mapped | % mapped* |
|-------------------------------|-------------|----------|-------------------|-----------|
| total RNA                     | 36          | 44748728 | 17509543          | 82        |
| nucleolar RNA                 | 36          | 39049758 | 15077407          | 91        |
| total RNA                     | 100         | 64020509 | 35257382          | 73        |
| nucleoplasmic RNA             | 100         | 72257683 | 26527408          | 68        |
| nucleolar RNA                 | 100         | 60301513 | 11002830          | 64        |
| total RNA, control            | 100         | 45478612 | 21587838          | 65        |
| total RNA, $\alpha$ -amanitin | 100         | 42072870 | 19739852          | 65        |
| total RNA, ML-60218           | 100         | 45270772 | 21404418          | 77        |
| total RNA, control            | 100         | 62902322 | 34570403          | 87        |
| total RNA, $\alpha$ -amanitin | 100         | 64700649 | 33350538          | 82        |
| total RNA, ML-60218           | 100         | 41871486 | 21033049          | 67        |
| total RNA, mock               | 100         | 53274853 | 26363971          | 73        |
| total RNA, <i>alu</i> RNA ASO | 100         | 55449460 | 27732908          | 77        |
| total RNA, control ASO        | 100         | 51555714 | 28641577          | 77        |

\* including multiple mapped reads and rRNA reads.

## Appendix Figures

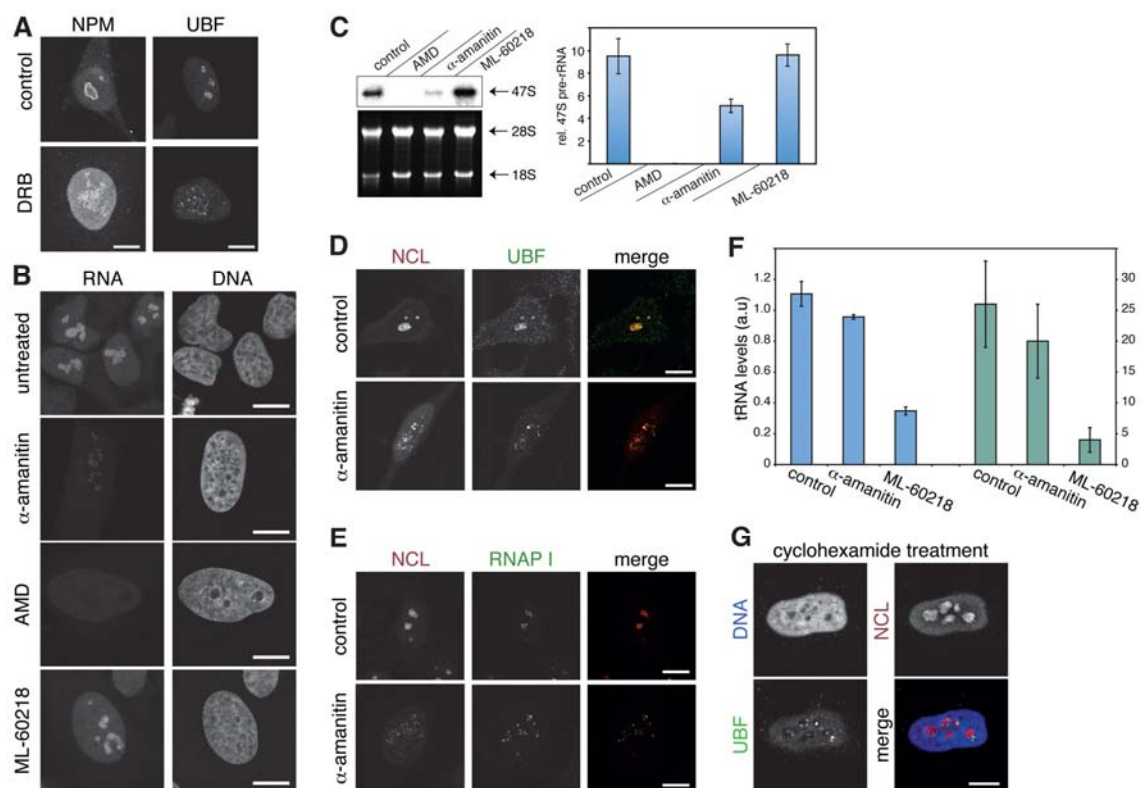

### Appendix Figure S1. Effects of drug treatment on nucleolar structure and function.

A. CLSM images of HeLa cells treated with DRB and of untreated control. The nucleolar marker proteins NPM and UBF were visualized by immunofluorescence with antibodies specific to NPM or UBF.

B. CLSM images of HeLa cells after treatment with the indicated drugs. Nascent RNA was pulse labeled with EU, and DNA was stained with DAPI.

C. Northern blot showing rRNA levels in untreated-, AMD-,  $\alpha$ -amanitin- and ML-60218-treated HeLa cells (left). The 47S pre-rRNA has a very short half-life time in the range of minutes (Popov et al., 2013) as compared to 18S and 28S that are stable for days (Defoiche et al., 2009). Accordingly, 47S steady-state levels reflect the rRNA synthesis rate. For quantification, samples were normalized to 18S rRNA as determined by RT-qPCR. Error bars represent the standard deviation ( $n = 6$ ).

D. CLSM images of HeLa cells treated with  $\alpha$ -amanitin. The localization of NCL (red) and UBF (green) was detected by immunofluorescence.

E. Same as in panel D but for NCL (red) and Pol I (green).

F. Tyrosine tRNA levels normalized to 18S rRNA as measured by RT-qPCR (left y-axis, blue) or RNA-seq (right y-axis, green) in untreated (control),  $\alpha$ -amanitin- or ML-60218-treated total RNA samples. Error bars represent the standard deviation (blue bars,  $n = 2$ ) or the 95% CI (green bars).

G. Distribution of DNA (blue), UBF (green) and NCL (red) in HeLa cells treated with cycloheximide for 5 hours and visualized by CLSM. Scale bars, 10  $\mu$ m.

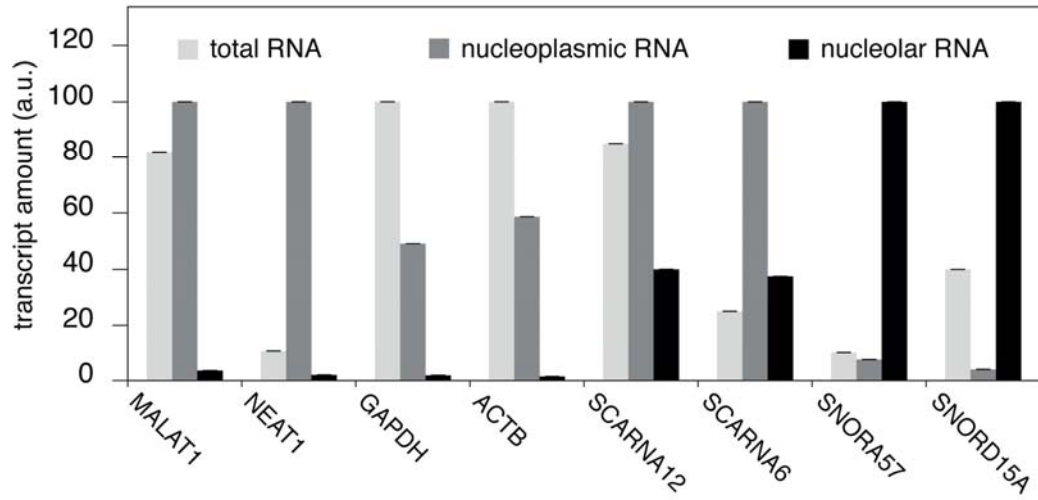

**Appendix Figure S2. Distribution of selected transcripts in total, nucleoplasmic and nucleolar RNA fractions.**

The relative amount of the indicated transcripts within the total, nucleoplasmic and nucleolar RNA fractions is plotted. Scale bars, 95% confidence interval (95% CI).



```

Region_7 -----AGAT CATGCCACCA CACTCCAGCC TG-G
Region_14 -----GGAT TGTGCCACTG TGCTCCAGCC TG-GGTGACA G
Region_30 -----AGAT CGTGCCATG CACTACGGCC T
Region_26 -----AGAT CGCACCCTG C
Region_23 AAAAAAAGGC TGGGCATGAT GGCTTATGCC TGTAATCCCA G-----CA CTTTGGGAGG C
Region_11 -----AGAT CACACCCTG CA
Region_24 -----TGAT TGCACCA
Region_2 -----AGAT TGCGCCAGCG TACTCCAGCC TG-GGCAACA GAGCGAGACT CAGTCTCAAG AAAAAAAAAA G--AAAGAAA GAAACA
Region_3 -----AGGT AGTG
Region_25 -----AGAT CGCGCCACTA CACTCC
Region_29 -----TGAC CATGCCACTG CACTC-AGCC TG-GGCAACA GAGTGAGACC CTGTCTCAAG AAAGAAAAAC GAGAAAGGGA GAGTCCCTCC ACTGTAAGGA GATCGGGTTC ATTACATTTT GGGGTGTTGG
Region_15 -----AGAT TGTGCCACTG CACTCCAGCC TG-GGTAACA G--TGAGACT CCGTCTCAA AAAAAAAAAA ---AAAGTGC CATGTAGTCC -CTGTGTGGG G--CAGGCC CAATCAGT-- -GCATGTGGG
Region_19 -----TGAT GGCACCCTG TACTCCAGCC TG-AGTAACA AAGACAGACC CTGTCTCTTA AGAAAAAAG
Region_22
Region_21
Region_28 -----AGAT CATGCCACTG CA
Region_27
Region_13
Region_31 -----TGAC CGTGCCACTG CACTCCAAC TG-GGTGA
Region_5 -----AGAT TGTGCCACTG CA
Region_8 -----AGAT CATGCCATG CACTAC
Region_4
Region_20 -----AGAT
Region_9 -----CAAT TGCACAAC TG CACTACAACC TG
Region_6 -----TTAT TCTGCCACTG CACTCCAGC
Region_17 -----TGGT GGCACCCT
Consensus agat .g.gccactg .....

```

**Appendix Figure S3. Sequence alignment of nucleolar-enriched *alu*RNAs.**

*Alu* element-containing RNAs (regions 1 to 31 from Table S2) enriched in the nucleolar RNA fraction over total RNA were aligned to derive a consensus sequence for nucleolar *alu*RNA (bottom line in the alignment). The degree of similarity to the consensus sequence is indicated by different colors: high, red; moderate, blue; neutral, black.

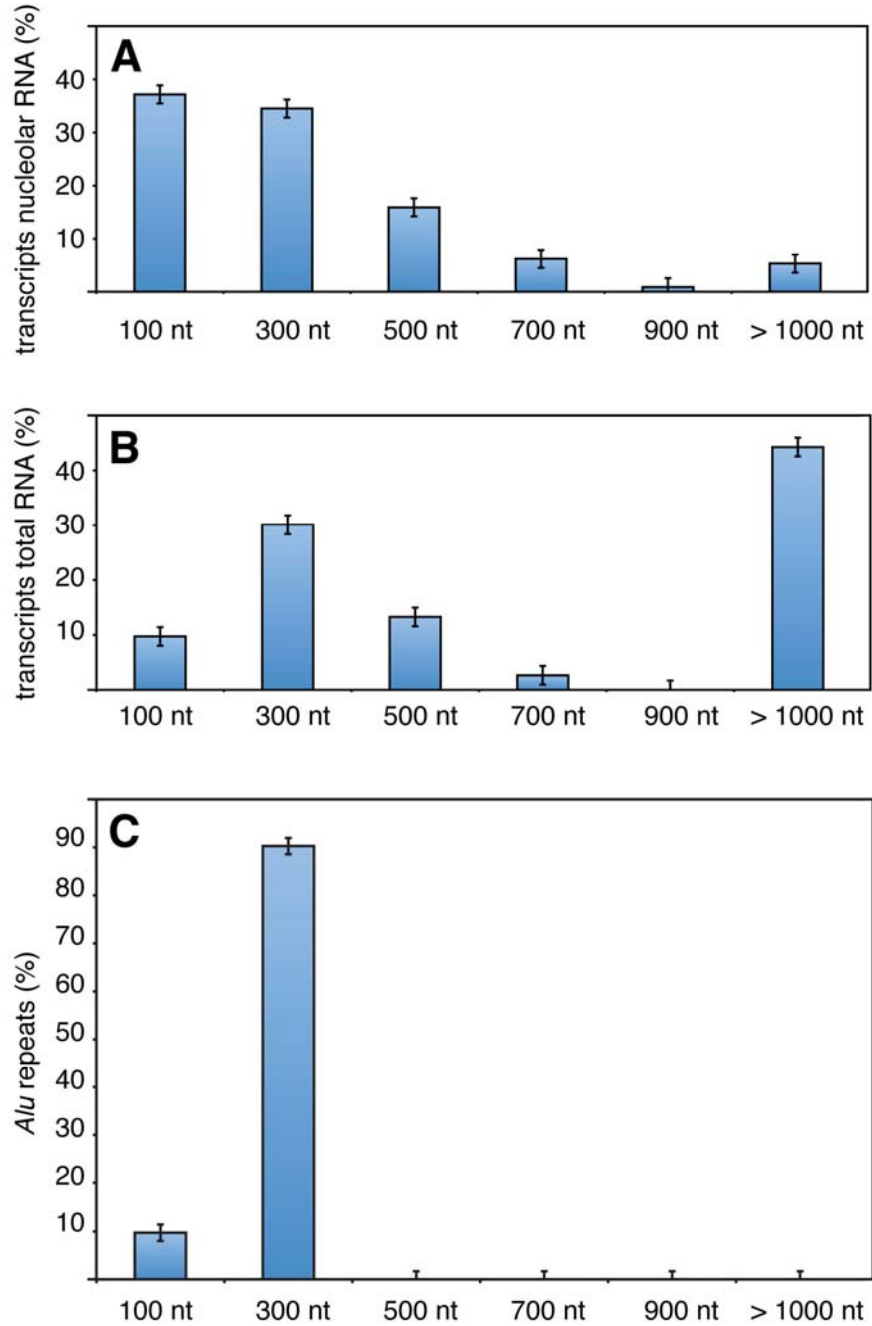

**Appendix Figure S4. Length distribution of *Alu* repeat-containing RNA transcripts from RNA-seq and corresponding genomic *Alu* elements.**

A. Length distribution of *Alu* repeat-containing nucleolar RNA sequences.

B. Length distribution of *Alu* repeat-containing total RNA sequences.

C. Length distribution of *Alu* element in the genome, which overlap with the RNA sequences from panel A and B.

Error bars, 95% CI.



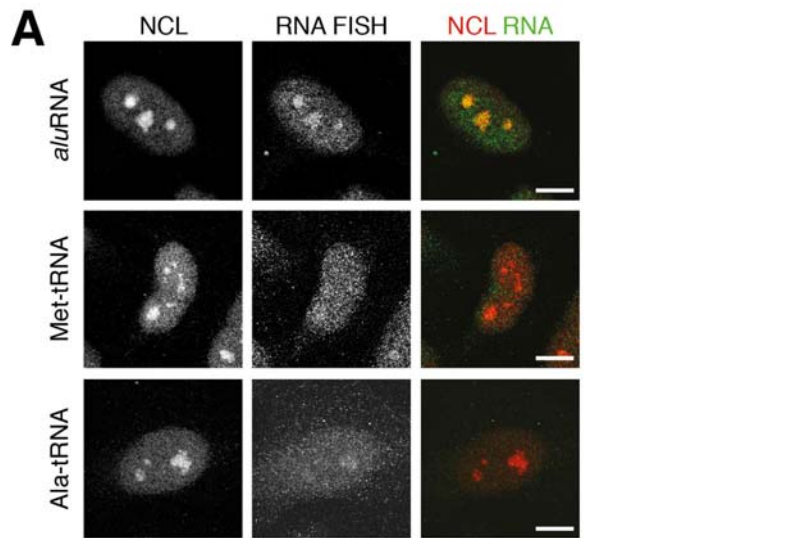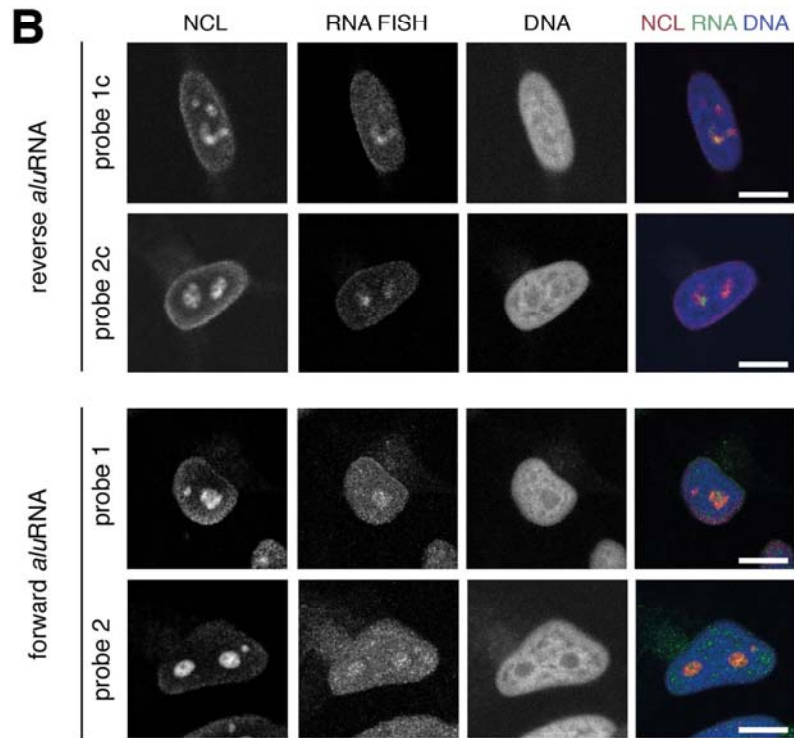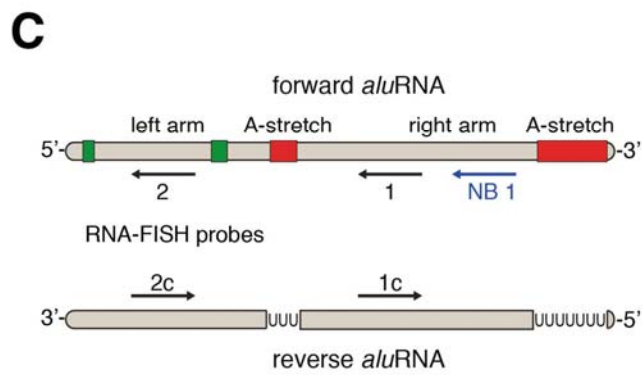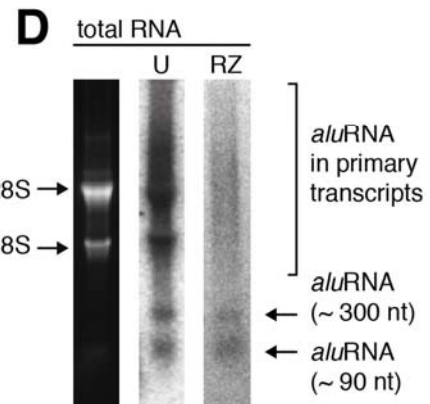

**Appendix Figure S5. Detection of *alu*RNAs in nucleoli and in total RNA.**

A. CLSM images of RNA-FISH analysis in HeLa cells using probes specific to forward *alu*RNA, methionine (Met-tRNA) and alanine (Ala-tRNA) tRNA sequences in HeLa cells. There is a weak signal in the nucleoli for the two tRNAs, which is in agreement with a small number of sequencing reads matching tRNA sequences found in the nucleolar fraction. The image intensity for the three RNA FISH images was normalized to the same nuclear intensity.

B. CLSM images of RNA-FISH against forward or reverse *alu*RNA sequences in HeLa cells. Color coding of merged images: RNA-FISH, green; NCL immunofluorescence, red; DNA (DAPI staining), blue. Scale bars, 10  $\mu$ m.

C. Scheme showing target sites of different RNA-FISH probes (1, 2, 1c and 2c, black arrows) and northern blot probe (NB 1, blue arrow) within a forward (top) or reverse (bottom) *Alu* repeat RNA sequence.

D. Northern blot analysis of purified total RNA probed with a sequence (NB1, see Appendix Table S4 and panel C) that targets the right arm of an *Alu* element. The bracket marks long primary transcripts with embedded *alu*RNA sequences. The position of the 300 nt length RNA was calculated according to co-migration of 7SL RNA and the position of the ~90 nt length RNA according to co-migration of tyrosine tRNA. In the lane labeled with RZ, total RNA after RiboZero treatment was loaded, in the lane U, an untreated total RNA sample. The position of 28S and 18S rRNA was detected by ethidium bromide staining of the untreated RNA sample.

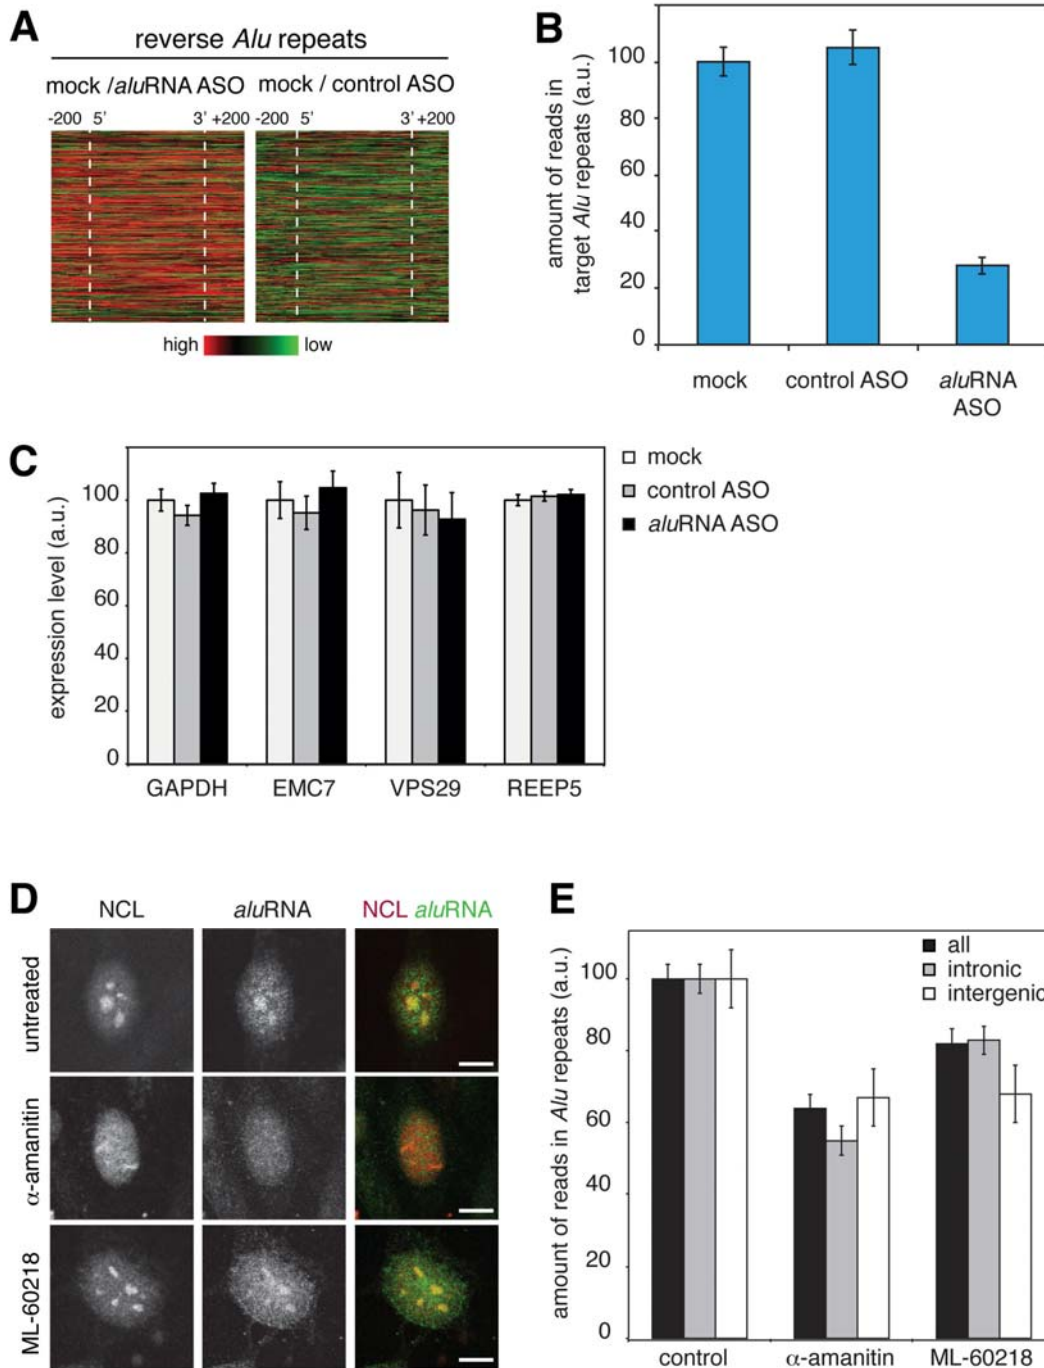

**Appendix Figure S6.** *aluRNA* levels are reduced after *aluRNA* ASO-mediated depletion or  $\alpha$ -amanitin treatment.

A. Heatmaps of read ratios obtained from total RNA sequencing of HeLa cells. Mock (transfection reagent only) ratio to *alu*RNA-ASO or control-ASO transfected cells. Colors indicate high (red) to low (green) read ratios.

B. Graph showing the amount of reads corresponding to *Alu* repeats that were targeted by the *alu*RNA ASO (n = 3737). Cells were treated with ASO as indicated.

C. Graph showing the expression levels of house keeping genes in ASO-treated cells as in panel B.

D. CLSM images of HeLa cells treated as indicated. The distribution of NCL (immunofluorescence) and *alu*RNA (RNA FISH) are shown. Color-coding in the merge images: red, NCL and green, *alu*RNA. Scale bars, 10  $\mu$ m.

E. Graph showing the amount of reads corresponding to all (n = 330 000), intronic (n = 250 000) or intergenic (n = 70 000) *Alu* repeats position. Cells were treated as indicated.

Error bars, 95% CI.

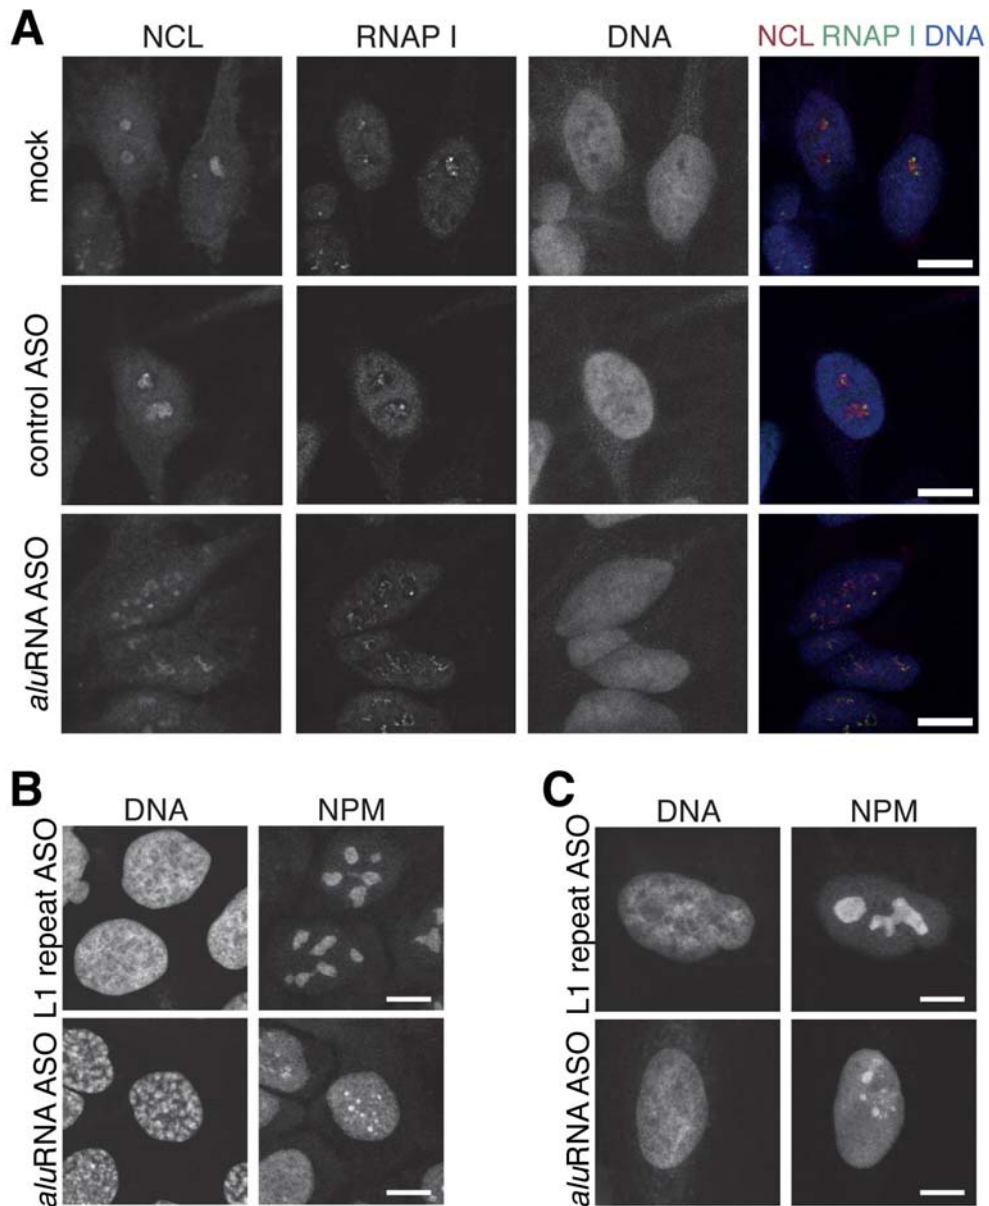

**Appendix Figure S7. Antisense oligonucleotides against *alu*RNA disrupt the nucleolar structure in different human cell types.**

A. CLSM images of HeLa cells treated with the indicated ASO. Nucleoli were visualized by immunofluorescence of NCL (red), Pol I (green), DNA was stained with DAPI.

B. CLSM images of human keratinocytes treated with the indicated ASO. Nucleoli were visualized by immunofluorescence of NPM (red), DNA was stained with DAPI.

C. CLSM images of human fibroblasts treated with the indicated ASO. Nucleoli were visualized by immunofluorescence of NPM (red), DNA was stained with DAPI.

Scale bars, 10  $\mu$ m.

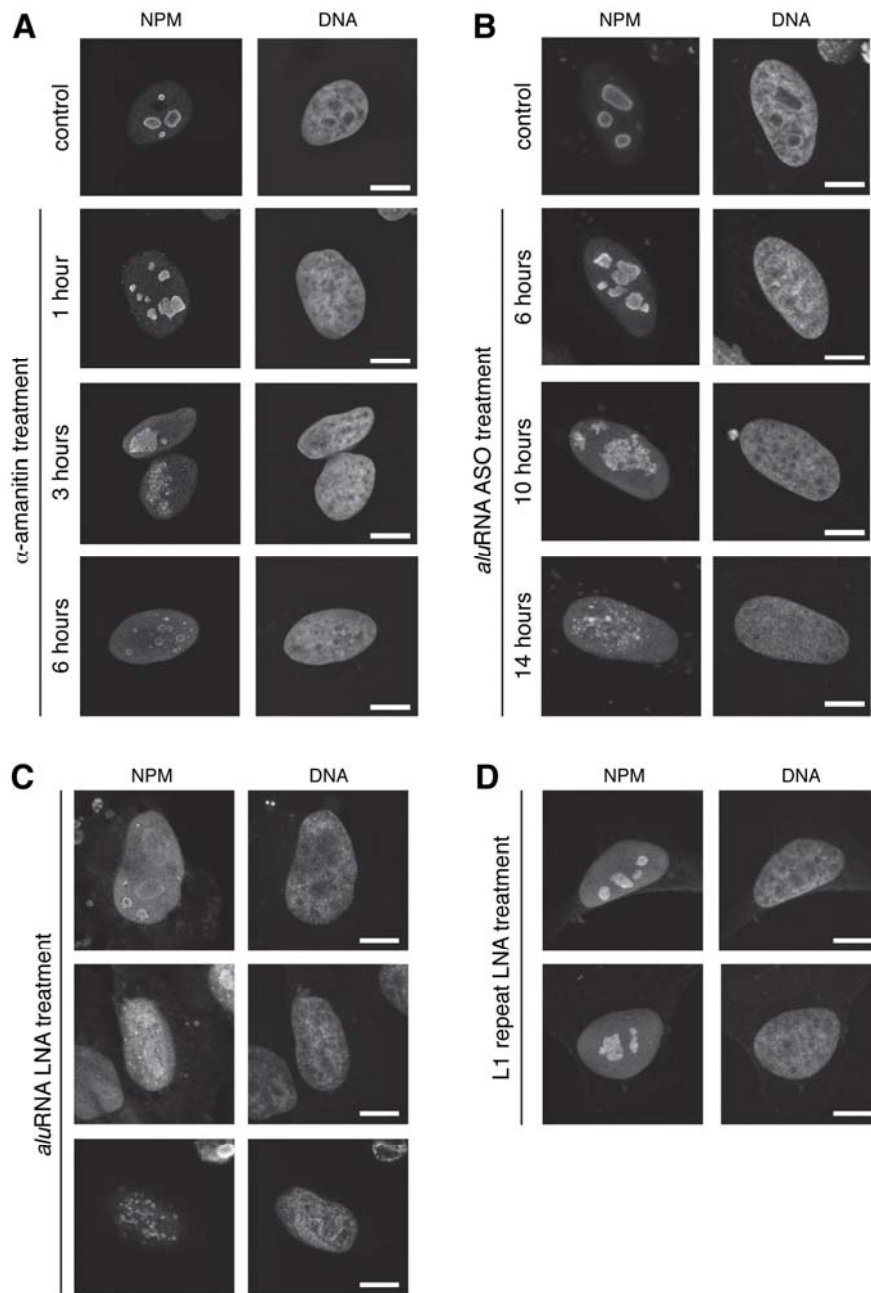

**Appendix Figure S8. Kinetics of nucleoli disruption upon inhibition of Pol II activity by  $\alpha$ -amanitin or depletion of *alu*RNAs are traced by time-lapse imaging.**

CLSM images of HeLa cells under different treatment conditions. Nucleoli were visualized by immunofluorescence of NPM, DNA by staining with DAPI. Scale bars in all images, 10  $\mu$ m.

A.  $\alpha$ -amanitin. B. ASO directed against the forward *alu*RNA. C. Blocking LNA probe directed against the forward *alu*RNA sequence. D. Blocking LNA probes directed against L1-repeat RNA.

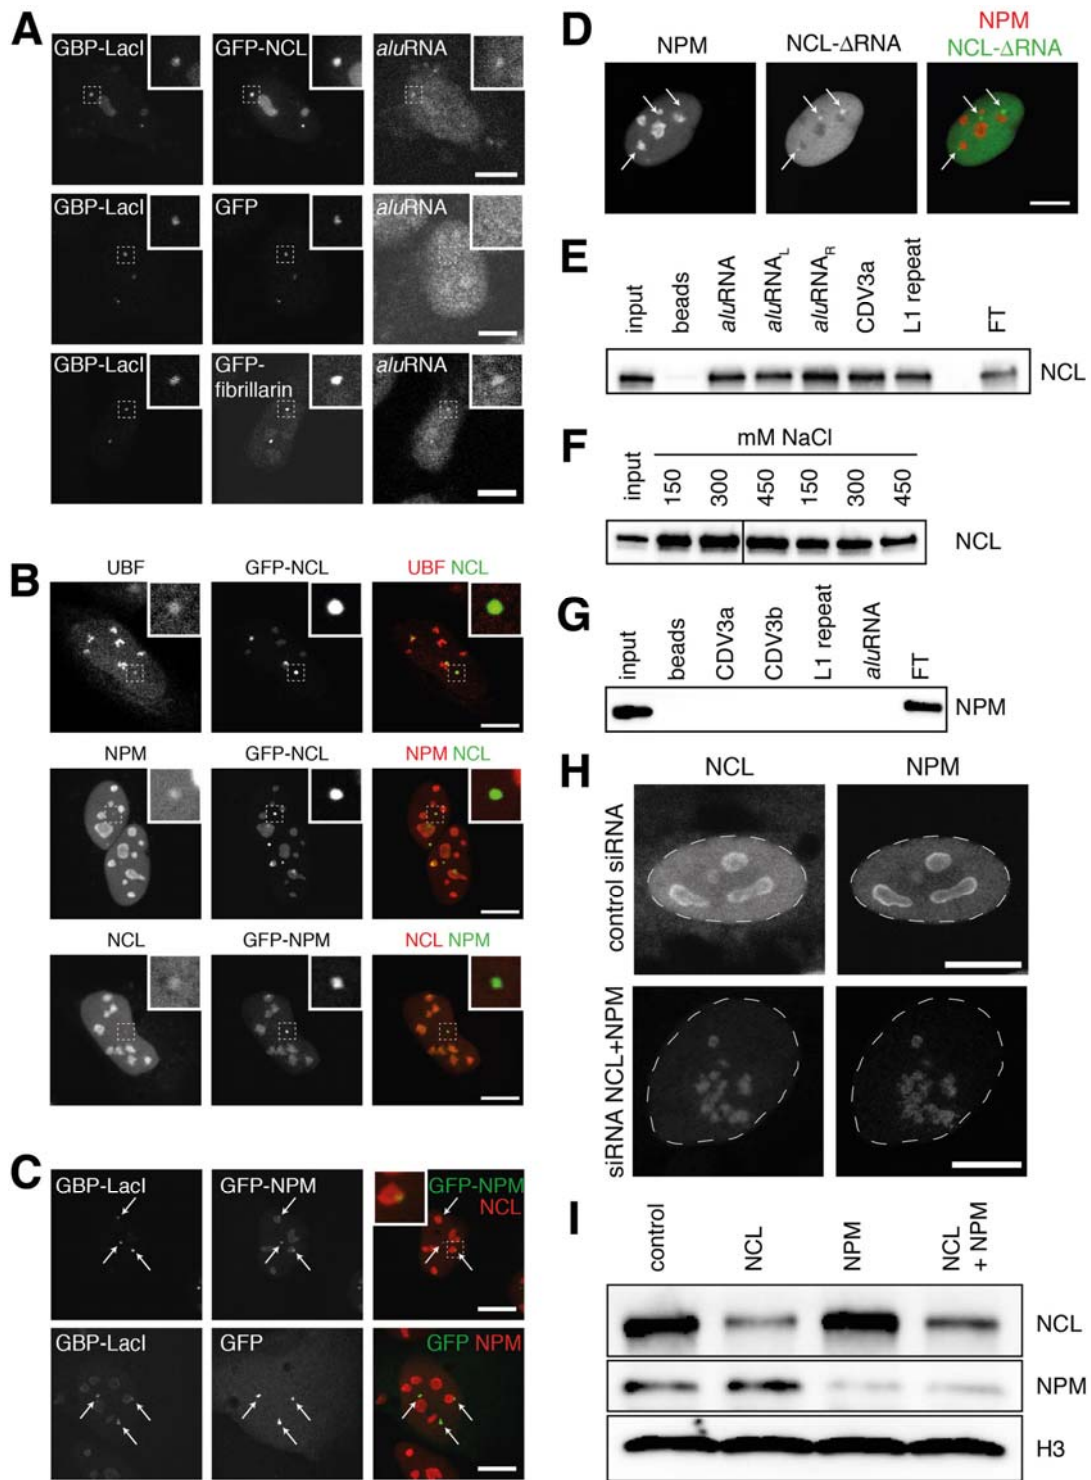

**Appendix Figure S9. NCL and NPM are required to preserve the nucleolar structure and interact differently with *alu*RNA.**

A-D, H. CLSM images showing the localization of the indicated proteins or RNAs. For recruitment of proteins to *lacO* arrays (panel A-D) the U2OS F6B2 cell line was used. Scale bars, 10  $\mu$ m.

A. Co-localization of GFP-NCL (upper panel), GFP (middle panel), or GFP-fibrillarin (lower panel) with GBP-LacI-RFP and *Alu*RNA. *Alu*RNA was visualized by RNA-FISH. The insets show enlarged images of one of the *lacO* loci.

B. Upper panel: immunostaining of UBF (red) and GFP-NCL (green); middle panel: immunostaining of NPM (red) and GFP-NCL (green); lower panel: immunostaining of NCL (red) and GFP-NPM (green). Insets indicate examples of *lacO* arrays to which the GFP-tagged protein was recruited.

C. GBP-LacI-RFP, GFP-NPM or GFP (green), and NCL or NPM visualized by immunostaining (red). Arrows indicate the stable inserted *lacO* arrays. The inset shows an example of a *lacO* array that is localized in the nucleolus.

D. NPM (immunofluorescence, red) and GFP-NCL- $\Delta$ RNA (green). Arrows indicate the position of the *lacO* array.

E-G. Western blot analysis of NCL or NPM binding to RNA in pull-down experiments using nuclear extract and the indicated biotinylated RNAs immobilized on streptavidin beads (see also Appendix Table S4). The lane labeled with "beads" indicates a sample that contained only the magnetic beads without biotinylated RNA. FT corresponds to the flow through fraction.

E. Binding of NCL to different RNAs in binding buffer containing 200 mM NaCl. 0.7  $\mu$ g/ $\mu$ l nuclear proteins were used. The FT sample is separated from the others by an empty lane.

F. Salt-dependent binding of NCL to forward *Alu*RNA in the presence of 70  $\mu$ g (lanes 2-4) or 35  $\mu$ g (lanes 5-7) of nuclear extract in a final volume of 100  $\mu$ l. Due to a broken well, 2 empty lanes, were removed from the blot image between the 3<sup>rd</sup> and 4<sup>th</sup> lane as marked by the line.

G. Binding of NPM to indicated RNAs under the same conditions as in panel E.

H. Nuclear distribution of NCL and NPM in HeLa cells transfected with control siRNA or siRNA specific to NPM and NCL. NCL and NPM were visualized by immunofluorescence. Images were taken with the same settings to allow for the comparison of fluorescence signals.

I. Western blot analysis of siRNA-mediated depletion of NCL and NPM in HeLa cells. Histone H3 was used as loading control. siRNA treatments reduced the amount of the corresponding protein by more than 50% (NCL) and 80% (NPM).
